# Supplementary material for: Proteomic and Bioinformatic Investigations of Heat-Treated Anisakis simplex Third-Stage Larvae
Source: MDPI journal article supplement (doi:10.3390/biom10071066), 2020-07-16

(a) A0A0M3KCE6 vs. *Asc I* 3

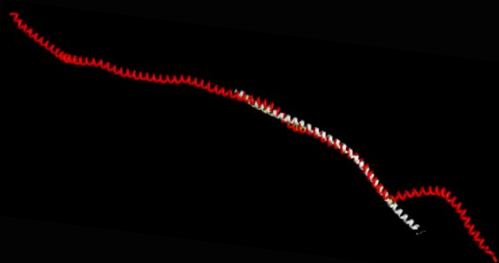

(b) A0A0M3KA05 vs. *Ani s* 8

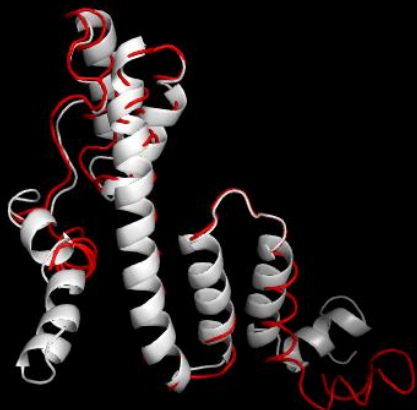

(c) A0A158PP35 vs. *Ani s* 2

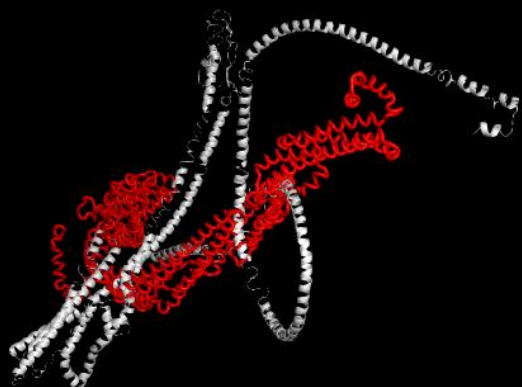

(d) A0A0M3J4T5 vs. *Ani s* 5

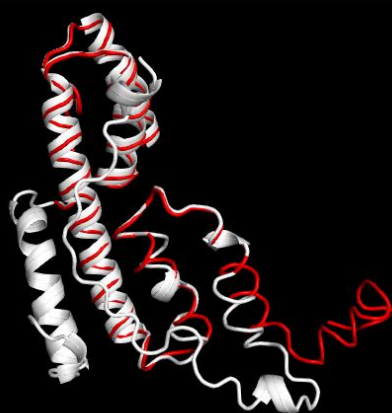

(e) A0A0M3J693 vs. *Asc I* 3

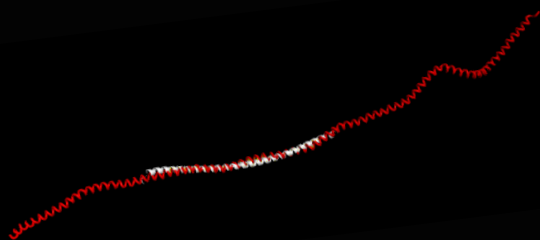

(f) A0A0M3K9V2 vs. *Tyr p* 28

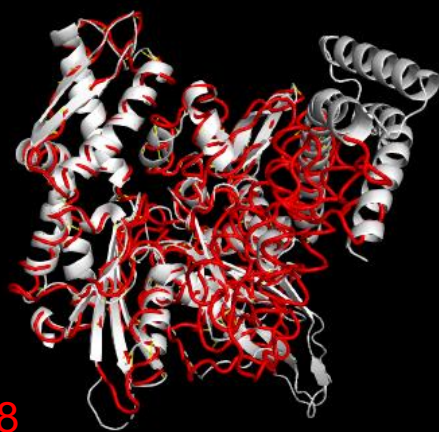

(g) A0A0M3KIW1 vs. *Tyr p* 28

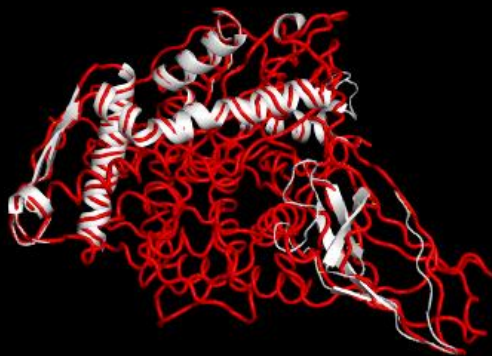

(h) A0A0M3J6G4 vs. **Ole e 15**

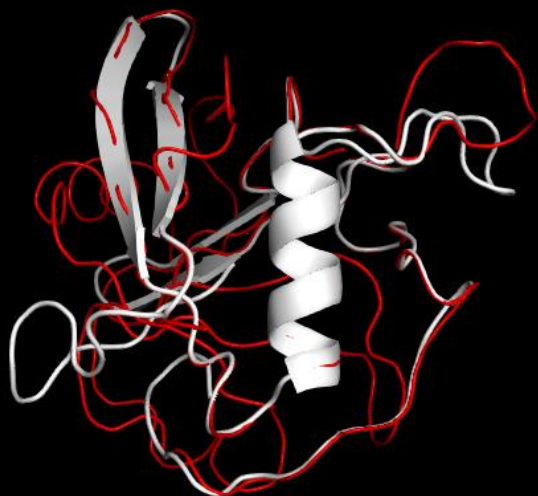

(i) A0A0M3JU57 vs. **Ani s troponin C**

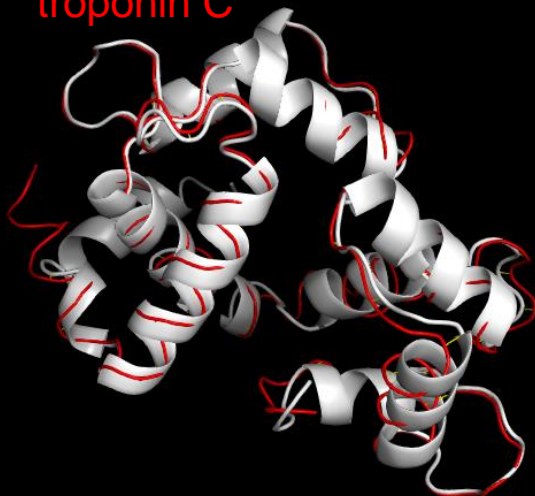

(j) A0A0M3K5H6 vs. **Aed a 8**

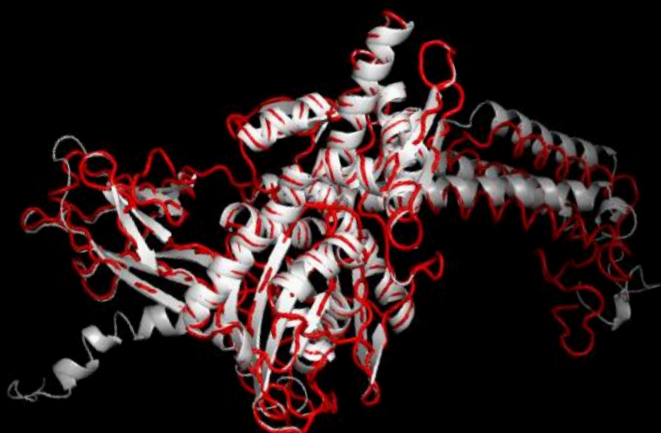

(k) A0A0M3J8H0 vs. **Ani s 9**

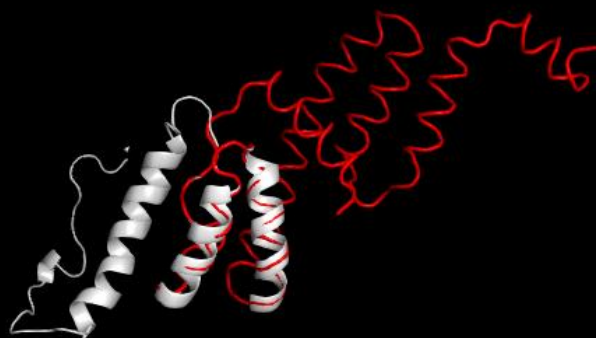

(l) A0A0M3K821 vs. **Der f 33**

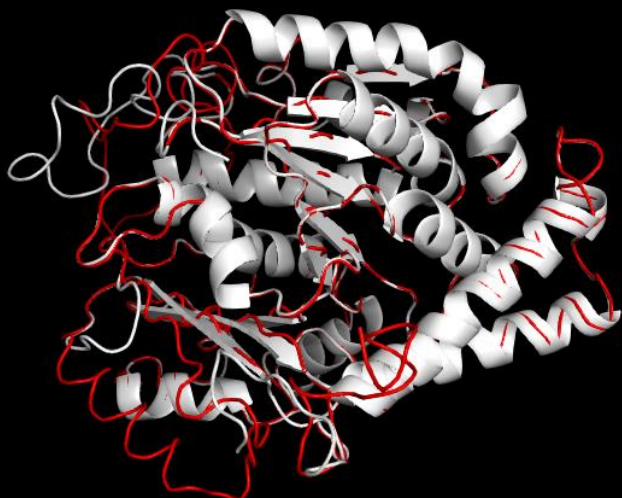

(m) A0A0M3KAH2 vs. **Der f 33-like**

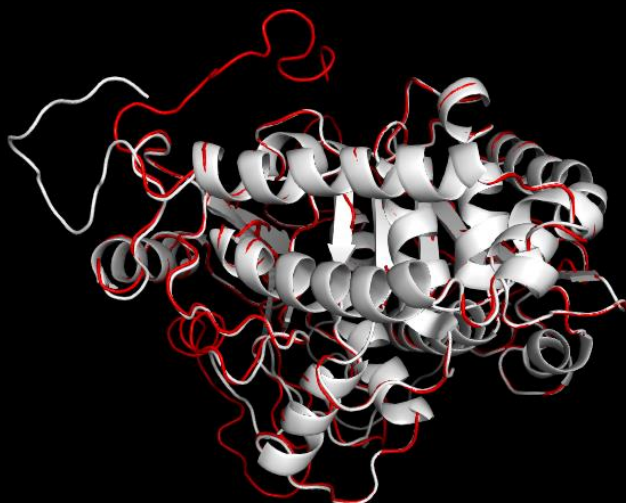

Supplement: s1 [file s1]
